## CORRIGENDUM

# The WIF domain of the human and *Drosophila* Wif-1 secreted factors confers specificity for Wnt or Hedgehog

David Sánchez-Hernández, Javier Sierra, João Ramalho Ortigão-Farias and Isabel Guerrero

There was an error published in *Development* **139**, 3849-3858.

Fig. 4B incorrectly showed an image of an *apGal4>UAS-hWIF1* wing disc instead of an *apGal4>NT<sup>Dm</sup>-WD<sup>Hs</sup>-EGF<sup>Dm</sup>* wing disc. The correct figure is shown below.

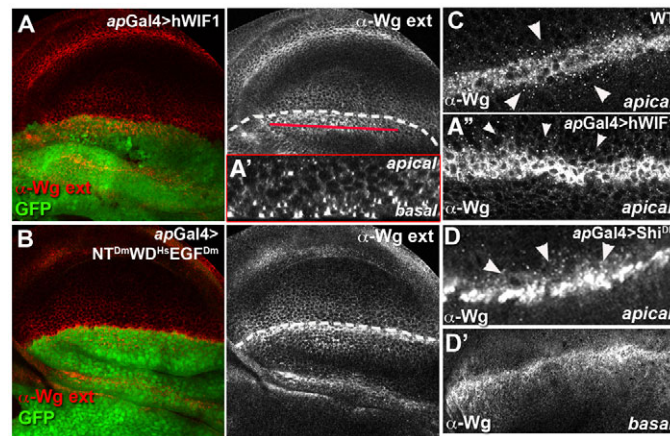

As both genotypes display a very similar disc phenotype, this error does not change the conclusions of the paper.

The authors apologise to readers for this mistake.
